# Supplementary material for: Comparative Transcriptome Analysis Identified Candidate Genes Related to Bailinggu Mushroom Formation and Genetic Markers for Genetic Analyses and Breeding
Source: PubMed Central journal article supplement (PMC5571210; doi:10.1038/s41598-017-08049-z), 2017-08-24
Supplement: 41598_2017_8049_MOESM1_ESM.pdf [file 41598_2017_8049_MOESM1_ESM.pdf]

## **Comparative Transcriptome Analysis Identified Candidate Genes Related to Mushroom Formation of Bailinggu and Genetic Markers for Genetic Analyses and Breeding**

Yongping Fu<sup>1,+</sup>, Yueting Dai<sup>1,+</sup>, Chentao Yang<sup>3</sup>, Peng Wei<sup>4</sup>, Bing Song<sup>1</sup>, Yang Yang<sup>1</sup>, Lei Sun<sup>1</sup>, Zhi-Wu Zhang<sup>2\*</sup>, Yu Li<sup>1\*</sup>

<sup>1</sup> Engineering Research Center of Chinese Ministry of Education for Edible and Medicinal Fungi, Jilin Agricultural University, Changchun, 130118, Jilin, China.

<sup>2</sup> Department of Crop and Soil Sciences, Washington State University, Pullman, 99164, Washington, USA.

<sup>3</sup> BGI-Shenzhen, Shenzhen 518083, China; China National GeneBank, Environmental Genomics, BGI-Shenzhen, Shenzhen, 518083, China;

<sup>4</sup> Key Laboratory of Integrated Pest Management on Crop in Northwestern Oasis, Urumqi 830091 Xinjiang, China

\* Corresponding author. Yu Li ([yuli966@126.com](mailto:yuli966@126.com)).

<sup>+</sup> These authors contributed equally to this work.

**Supplementary Figure S1-6**

**Supplementary Table S1-8**

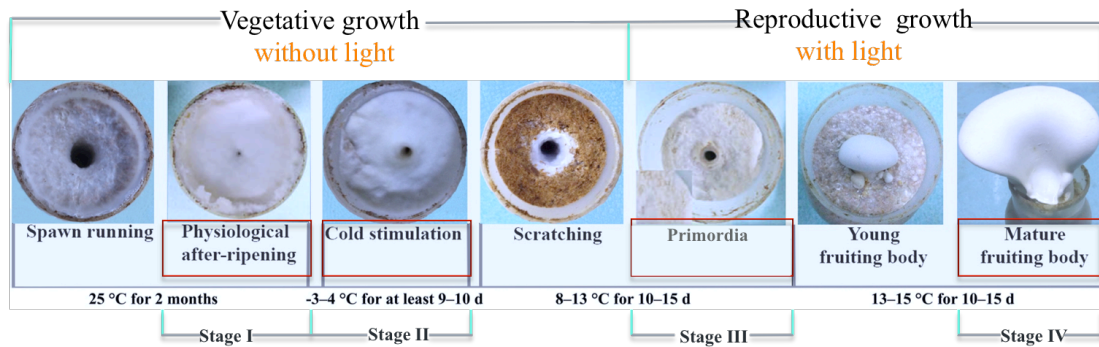

**Supplementary Figure S1. Developmental stages of Bailinggu in year-round mushroom factory cultivation cycles.** The vegetative (spawning, physiological ripening, cold stimulation) and fructification (primordia, fruiting body) phases are shown.

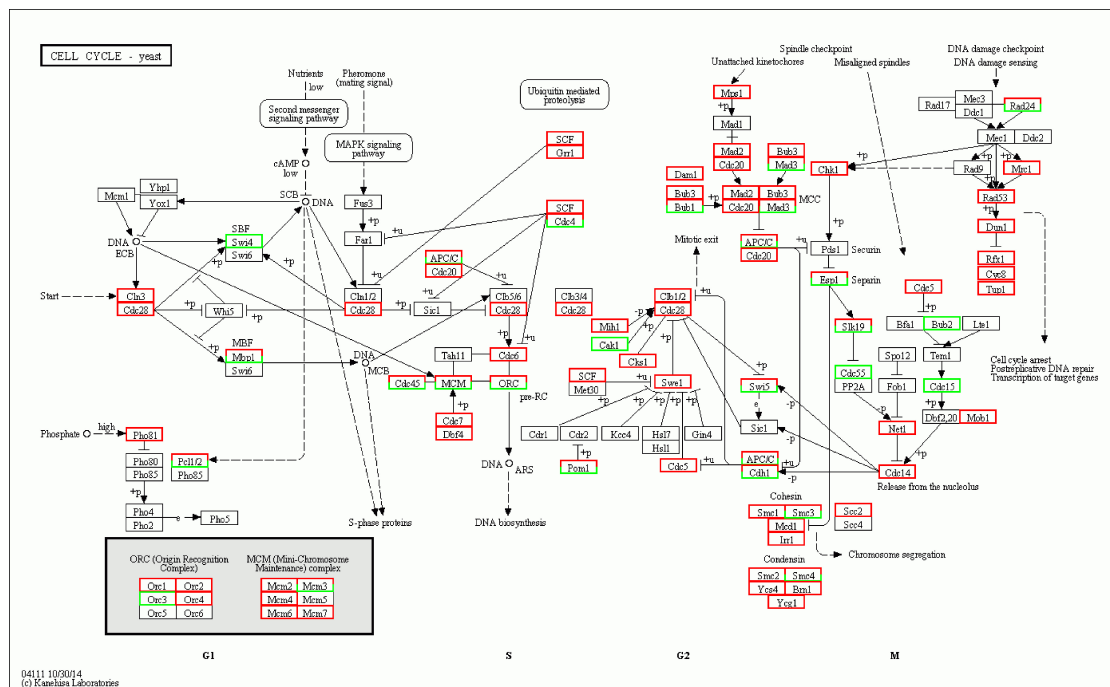

**Supplementary Figure S2. The vegetative-to-reproductive transition stage related pathway-Cell cycle** (<http://www.kegg.jp/kegg/kegg1.html>, derived from KEGG map04111) was identified by KEGG annotation [1-3]. The red and green boxes indicate that the up-regulation and down-regulation unigenes identified in the transcriptome of Bailinggu are annotated in the pathway, respectively.

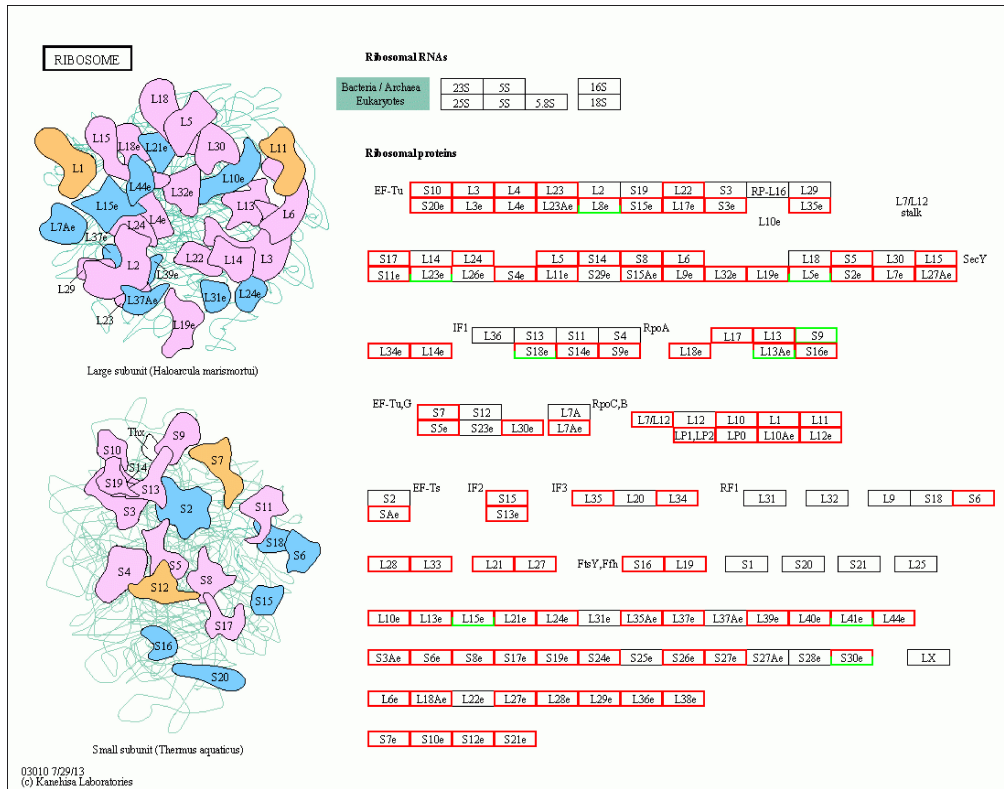

**Supplementary Figure S3.** The vegetative-to-reproductive transition stage related pathway-Ribosome (<http://www.kegg.jp/kegg/kegg1.html>, derived from KEGG map03010) was identified by KEGG annotation [1-3]. The red and green boxes indicate that the up-regulation and down-regulation unigenes identified in the transcriptome of Bailinggu are annotated in the pathway, respectively.

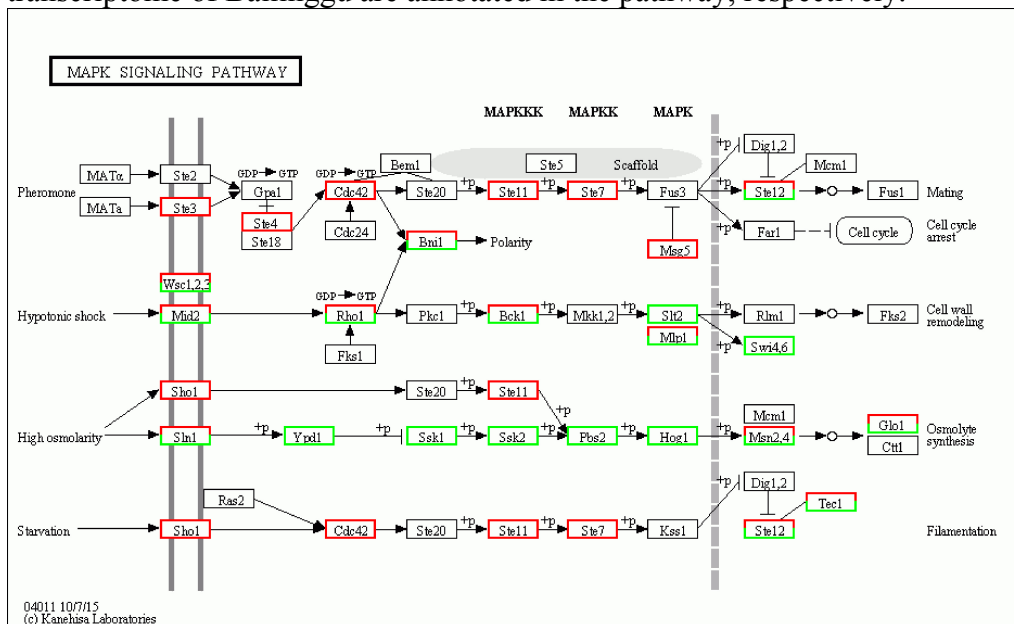

**Supplementary Figure S4.** The vegetative-to-reproductive transition stage related pathway-Mitogen-activated protein kinases (MAPK) signaling pathway (<http://www.kegg.jp/kegg/kegg1.html>, derived from KEGG map04011) was identified by KEGG annotation [1-3]. The red and green boxes indicate that the up-regulation and down-regulation unigenes identified in the transcriptome of Bailinggu are annotated in the pathway, respectively.

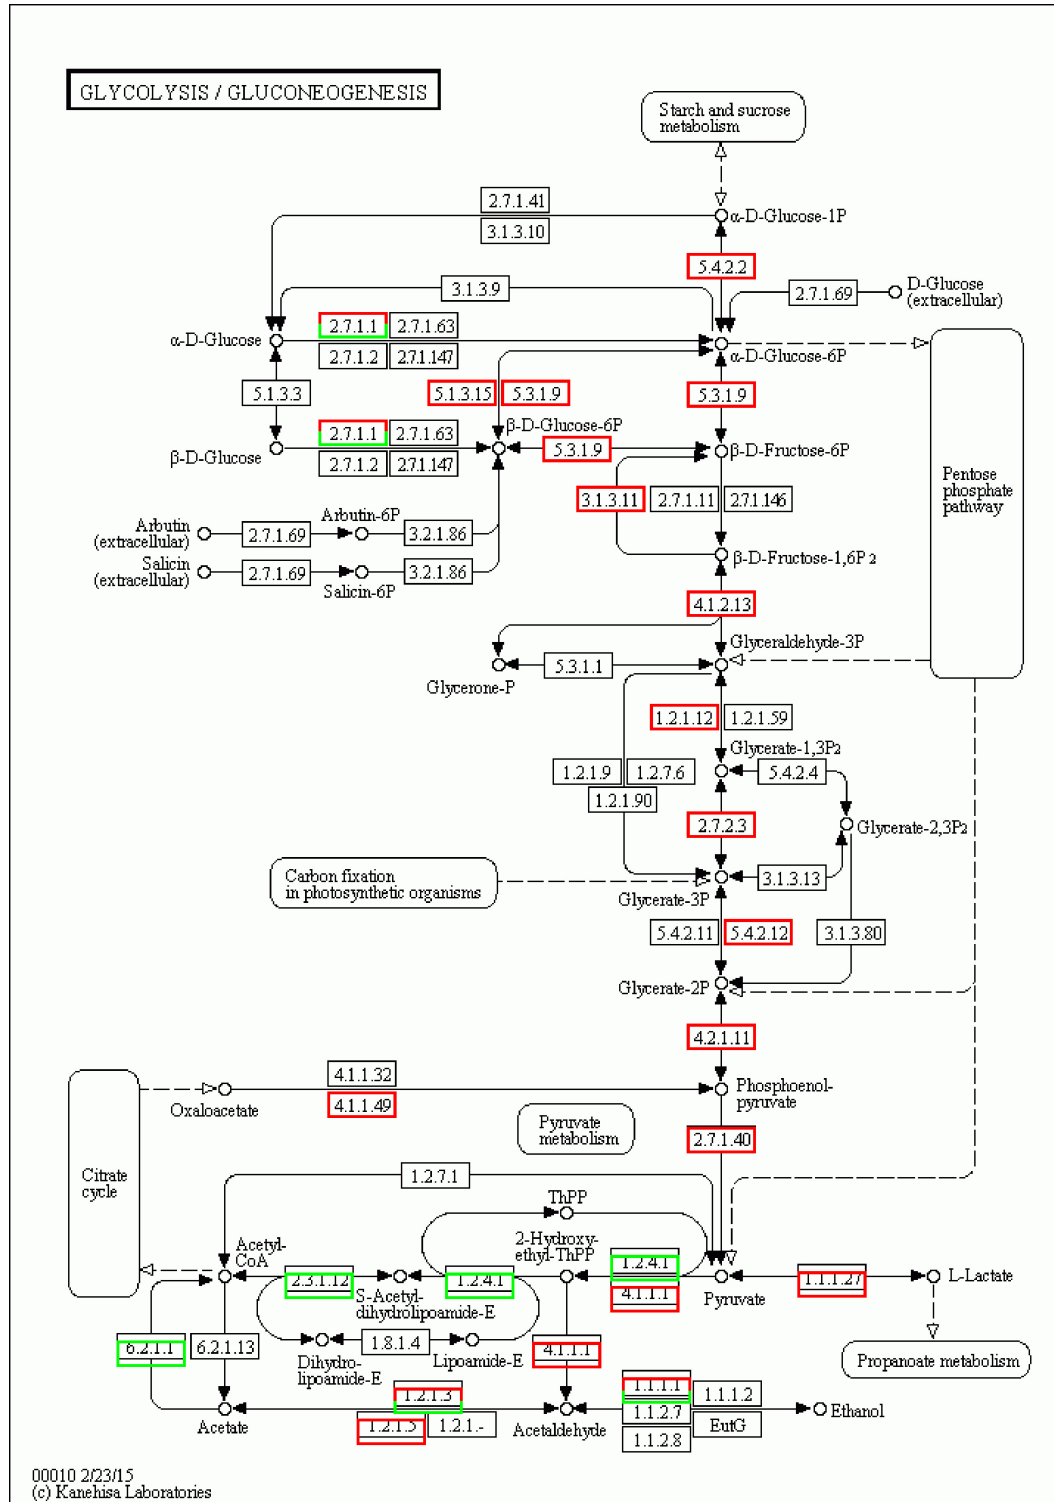

**Supplementary Figure S5.** The reproductive growth stage related pathway-Glycolysis (<http://www.kegg.jp/kegg/kegg1.html>, derived from KEGG map00010) was identified by KEGG annotation [1-3]. The red and green boxes indicate that the up-regulation and down-regulation unigenes identified in the transcriptome of Bailinggu are annotated in the pathways, respectively.

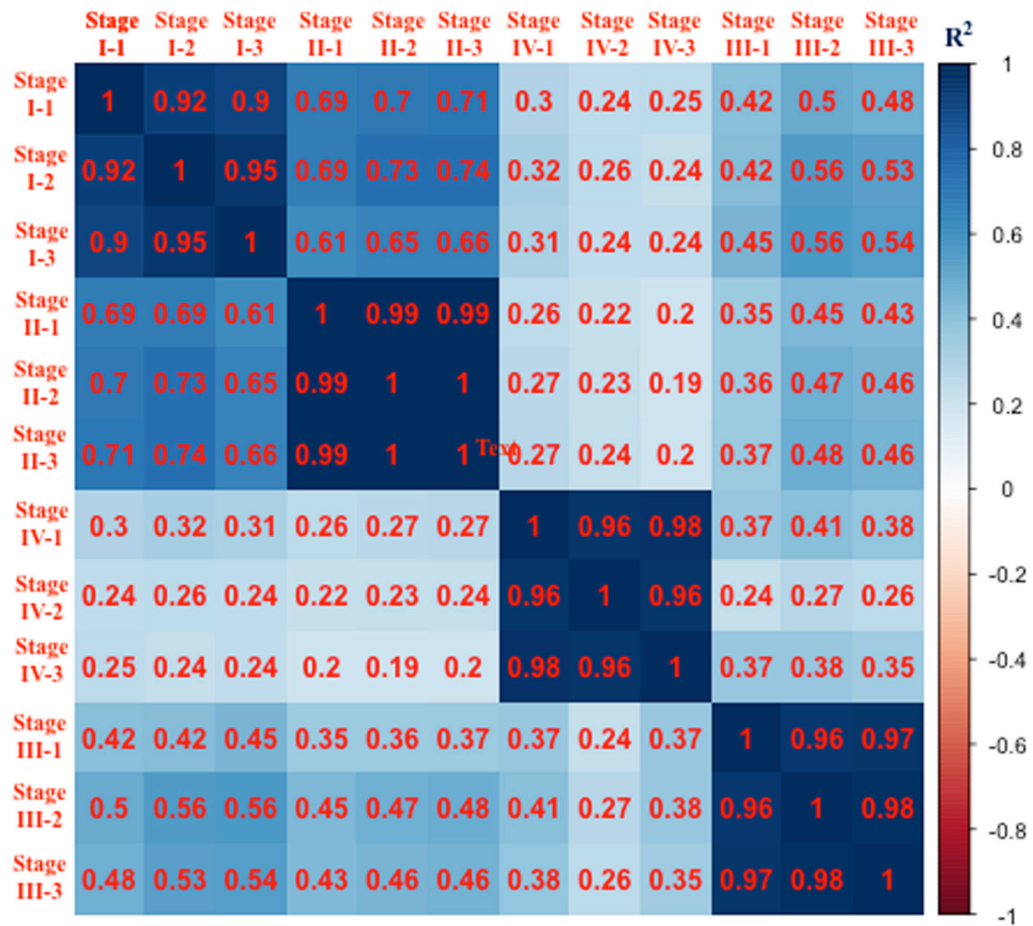

**Supplementary Figure S6. Pearson correlation between samples using FPKM.** The  $\log_{10}(\text{FPKM}+1)$  of the samples are displayed along the x-axis and y-axis.  $R^2$  represents the Pearson correlation coefficient squared.

**Supplementary Table S1. Characteristics of the 100 novel EST-SSR markers used in this study.**

| Locus    | Motif                                                                                                                                                    | Forward Primer<br>(5'-3') | Reverse Primer<br>(5'-3') | T <sub>a</sub><br>(°C) | Polymorphism/Monomorphism/No product |        |           |
|----------|----------------------------------------------------------------------------------------------------------------------------------------------------------|---------------------------|---------------------------|------------------------|--------------------------------------|--------|-----------|
|          |                                                                                                                                                          |                           |                           |                        | Bailinggu                            | Aweigu | Xingbaogu |
| BlgSSR1  | (CTC) <sub>6</sub>                                                                                                                                       | GCATTCGAACT<br>CTCCACCTC  | GACTTCGATTC<br>GCAAGAACC  | 60                     | P                                    | P      | P         |
| BlgSSR2  | (TCG) <sub>5</sub>                                                                                                                                       | TGATCGTGGTC<br>ATCTGGGTA  | GTCCTATACCA<br>GGCTGCTCG  | 60                     | P                                    | P      | P         |
| BlgSSR3  | (GAG) <sub>5</sub>                                                                                                                                       | CGTCGGCATAT<br>CGACTATCA  | CTGGCTATGAC<br>TCCCATCGT  | 60                     | P                                    | P      | P         |
| BlgSSR4  | (TA) <sub>7</sub>                                                                                                                                        | ACTCGCACGA<br>CACTTCACTG  | CAAGGATGTG<br>GAATGCAATG  | 60                     | P                                    | M      | P         |
| BlgSSR5  | (CAG) <sub>5</sub>                                                                                                                                       | GCATACTCTCA<br>GCCGTCCTC  | TTAGAGAGTG<br>GCGGTCGAAT  | 60                     | P                                    | P      | P         |
| BlgSSR6  | (TA) <sub>7</sub>                                                                                                                                        | ATCTCACGTTG<br>AGCAGGTCC  | ACCTATCACGA<br>GCCGCATAC  | 60                     | P                                    | P      | P         |
| BlgSSR7  | (CGC) <sub>5</sub>                                                                                                                                       | TTCAGTTCAGC<br>GAACCCTCT  | TTAGCCTTCTC<br>GACGGTGT   | 60                     | P                                    | P      | P         |
| BlgSSR8  | (AT) <sub>7</sub>                                                                                                                                        | TCCTCTATCTC<br>GCCATCAC   | GGGACAGCCT<br>ATTCCAGGAT  | 60                     | P                                    | P      | M         |
| BlgSSR9  | (TGA) <sub>5</sub>                                                                                                                                       | TCTTGGTCGAA<br>GAAAGCGAT  | CTTTCCGAGAT<br>GTACGCTCC  | 60                     | P                                    | M      | M         |
| BlgSSR10 | (TTG) <sub>5</sub>                                                                                                                                       | CCAGAGGGCG<br>TATAGTGGTC  | AACGACCAGG<br>ACACGATGAT  | 60                     | P                                    | P      | P         |
| BlgSSR11 | (CCA) <sub>5</sub> a(CAC) <sub>6</sub><br>6ctcggctcgatec<br>ctaccaagctatctc<br>gacgatcatcataatc<br>atcgaaccaccagg<br>gccgggaccaggg(<br>CCT) <sub>6</sub> | TCCATAATTGT<br>CATCTCCCA  | AAATAATTAC<br>GACGGTGGGC  | 60                     | P                                    | P      | P         |
| BlgSSR12 | (CGA) <sub>6</sub>                                                                                                                                       | ACGGCGATAC<br>GAATGAAGTC  | GGAAGACCAT<br>TGCTGATCGT  | 60                     | P                                    | P      | P         |
| BlgSSR13 | (AT) <sub>9</sub>                                                                                                                                        | GCCGCAAGAA<br>ATATCCAAGA  | TCAGTCAGGG<br>GAAGTGAACC  | 60                     | P                                    | M      | P         |
| BlgSSR14 | (GTC) <sub>5</sub> gccgcc(<br>GTCGGT) <sub>9</sub>                                                                                                       | ATCTGTCTCGC<br>GGTGATTCT  | CTCGAGACCCT<br>TCTTGACCA  | 60                     | P                                    | P      | P         |
| BlgSSR15 | (CCA) <sub>6</sub>                                                                                                                                       | ACGTTGAAAA<br>CTCCGACATC  | GTCGATGGTAT<br>CGGACGACT  | 60                     | P                                    | P      | P         |
| BlgSSR16 | (GCT) <sub>7</sub> gagcggg<br>ftgccaatagtcca<br>ccagaaggttgctgc<br>tggtgagaaggctgtc<br>caaagagtccccca<br>gtagtcccaga(CT<br>G) <sub>5</sub>               | ATGAACCGAA<br>TCCACCAAAA  | GGTAGTTTGT<br>CGGTCAGCC   | 60                     | P                                    | P      | P         |
| BlgSSR17 | (TGC) <sub>6</sub>                                                                                                                                       | AGTGTTTGTTC<br>TCGGGGTTG  | TTCTGTCCGT<br>CAGCATCAC   | 60                     | P                                    | P      | P         |
| BlgSSR18 | (GCAAC) <sub>5</sub>                                                                                                                                     | GTCCTGTCCAT<br>CGATGTGTG  | GTTGTCTCTCT<br>TTCCGTCCG  | 60                     | P                                    | P      | P         |
| BlgSSR19 | (CAC) <sub>5</sub>                                                                                                                                       | TGACCACCACC<br>AATCGTAGA  | CGTAACATCTG<br>GGGAATGCT  | 60                     | M                                    | P      | P         |
| BlgSSR20 | (CCA) <sub>5</sub>                                                                                                                                       | ATTGCACGATG<br>ACGCTACAG  | AAAATGGCAA<br>GATCTGCACC  | 60                     | P                                    | P      | P         |
| BlgSSR21 | (GTG) <sub>6</sub>                                                                                                                                       | ATTATCCTCCC<br>TGCCTTCGT  | CGTCTGAATGT<br>CCACCCTTT  | 60                     | P                                    | P      | P         |
| BlgSSR22 | (CGT) <sub>6</sub>                                                                                                                                       | TTCGACATCTT<br>CTTCCCAC   | ACCATCCATAG<br>GTGCTCGTC  | 60                     | P                                    | P      | P         |
| BlgSSR23 | (GGT) <sub>6</sub>                                                                                                                                       | GAAGGTGCGA<br>ATATAAGCGG  | ACTACGAAGG<br>CCGTCCCTAT  | 60                     | P                                    | P      | P         |
| BlgSSR24 | (GAG) <sub>14</sub>                                                                                                                                      | ATCGGATTCGT<br>TGTCGGTAG  | CGGATTCCTCC<br>TCTTCTTCC  | 60                     | P                                    | P      | P         |
| BlgSSR25 | (TG) <sub>6</sub>                                                                                                                                        | TGCATCCTCCT<br>CTGCTACCT  | ATACAATCGCC<br>TCCGATCAC  | 60                     | P                                    | P      | P         |
| BlgSSR26 | (ACA) <sub>5</sub>                                                                                                                                       | AAGAGACCGC<br>AAACGAAATG  | CAAGGCGGGT<br>GGTCTTAGTA  | 60                     | M                                    | P      | M         |

|          |                                                     |                           |                           |    |   |   |   |
|----------|-----------------------------------------------------|---------------------------|---------------------------|----|---|---|---|
| BlgSSR27 | (CGT)5                                              | TCTTTGGTTCC<br>AGTCCCAAC  | GAGCAGAAGA<br>AGGGCAGCTA  | 60 | P | M | P |
| BlgSSR28 | (GAG)7                                              | GAGCCTTCGA<br>AACGTAGCAC  | CCCACATATCA<br>ACGTATCG   | 60 | P | M | M |
| BlgSSR29 | (GGTA)5                                             | CGGTACGCAG<br>ATAGAGGGAG  | ATCGTCTACCC<br>AATGCCAAG  | 60 | P | M | P |
| BlgSSR30 | (CT)7ccgtttccctc<br>tetctttctttctcttt<br>ctccg(TC)9 | TTTCCCCGCTT<br>TATTGTTTG  | ATGGGGAATG<br>GGGATAAGAG  | 60 | P | N | N |
| BlgSSR31 | (CTC)5                                              | CAGCTCTGTCT<br>TCTCCGTCC  | GGTAAAGCAA<br>CTCGAGCGAC  | 60 | P | N | N |
| BlgSSR32 | (GTG)6                                              | GTAATGTGG<br>CGGAGGAAAG   | CCACATGGAA<br>TGCAGATGAG  | 60 | M | P | M |
| BlgSSR33 | (TGC)5                                              | TCTCACGAGAT<br>GGTGGTGAC  | CTACGGTGCA<br>GTCGTGTTGT  | 60 | M | M | M |
| BlgSSR34 | (GCG)5                                              | CATCCAAATCC<br>AAATCCCAC  | ATCTGAGCCTG<br>GACATCGAC  | 60 | P | M | P |
| BlgSSR35 | (CGC)5                                              | AACATGTTCTC<br>CAAGGCCAC  | ATGCGTGCTAA<br>CTGAACGTG  | 60 | P | M | M |
| BlgSSR36 | (TCG)6                                              | TTCTTGGTGCT<br>CGATATCCC  | ACGGTGGCATT<br>GAAGAAGAC  | 60 | P | M | M |
| BlgSSR37 | (CGA)7                                              | ACAAAGGATA<br>CGGCCAACTG  | TTGCTTCGCTT<br>GAAGAGTGA  | 60 | P | M | P |
| BlgSSR38 | (CGT)6                                              | TTCGCTTCTTC<br>GTTTTTCGT  | GCTAAATGGA<br>GGGTGCGTTA  | 60 | P | N | N |
| BlgSSR39 | (GCA)7                                              | AGAAGAATGG<br>CGGTCAGCTA  | TGGTATAGTAT<br>GGGTGGCGG  | 60 | P | P | P |
| BlgSSR40 | (CT)6                                               | AAAGCTTAACT<br>CACGCCACG  | TGGGACCATA<br>GCTGGTTTTTC | 60 | N | N | N |
| BlgSSR41 | (GA)6                                               | ATATGCGGAG<br>GAGAGGGAGT  | TGGCGTAGAG<br>TTCTTCGGTT  | 60 | P | P | P |
| BlgSSR42 | (TC)7                                               | CCACCCAAGTC<br>ATTCGTCTT  | AGAATCTCCCG<br>CGTTTACCT  | 60 | P | M | M |
| BlgSSR43 | (TC)8                                               | AGTAGTGTGC<br>GTGCGAAGTG  | GTTGATGCGGC<br>TGGAATACT  | 60 | P | N | N |
| BlgSSR44 | (AT)9                                               | CTCAATCGACA<br>AGCAATGGA  | ATGTGATGCTG<br>CGACTCAAG  | 60 | P | M | N |
| BlgSSR45 | (AGC)6                                              | GCTCGAAGAA<br>AAGGCAACTG  | CGAAAAGCCT<br>AGATGCTCCA  | 60 | M | N | N |
| BlgSSR46 | (TGTA)6                                             | CCGTTCCCTTCT<br>TTTGCTCTG | AGGTATACAA<br>CCTGACGCGG  | 60 | P | M | N |
| BlgSSR47 | (GGC)7                                              | CTTAACGTCGT<br>CGTCCCATT  | AACGTCGAGA<br>CATACCGGAC  | 60 | P | P | M |
| BlgSSR48 | (ACCG)7                                             | ACCCCTTACGG<br>ACTAACGCT  | CTGTCTTGCT<br>GTCCGTGAA   | 60 | P | M | M |
| BlgSSR49 | (AT)8                                               | CCACCGATTCT<br>TGGACTCAT  | GAGTGTCCCG<br>AAGTCTGAGC  | 60 | P | M | M |
| BlgSSR50 | (GGC)5                                              | GGAGGTTGAC<br>GTGAACGAAT  | GCGAAGATTCT<br>ACGAGTCCG  | 60 | P | M | P |
| BlgSSR51 | (CGA)6                                              | CGGATCCGAA<br>CCTAGTCAAA  | GCCGGTATATT<br>CGTCCTTGA  | 60 | M | M | M |
| BlgSSR52 | (CCG)5                                              | CATCCTCGGGT<br>TGATGATTT  | CAGCGGACCTT<br>ACTGAGGAG  | 60 | N | N | N |
| BlgSSR53 | (CG)8                                               | CCCTCTGCAAA<br>TCGTCTAGG  | GAAATACGGG<br>TATGCCAACG  | 60 | P | N | N |
| BlgSSR54 | (AT)7                                               | CTCATTGCGCA<br>CAACATTCT  | CAATACCCTTT<br>CTTGTCGCG  | 60 | P | N | N |
| BlgSSR55 | (GCG)7                                              | AGGTGTGTTGG<br>GAGGTGAAG  | CGGCTCGTCAT<br>TTATCCATT  | 60 | P | P | P |
| BlgSSR56 | (CG)6                                               | TCGCCGTCGTC<br>TAATTCTTC  | AGAAAGAATG<br>GGGAGGAGGA  | 60 | N | N | N |
| BlgSSR57 | (AT)8                                               | CGCTTGAGCT<br>ACCTACTGC   | AACGTAGATG<br>ACGGGAGGTG  | 60 | P | N | N |
| BlgSSR58 | (ACC)5                                              | GCAGATATTG<br>ATGTGCGCCT  | TGGAGTATAA<br>GGTACGGCGG  | 60 | P | P | N |
| BlgSSR59 | (CTC)5                                              | CCGAAAGTCC<br>AAAGTCCAAA  | ACCCATTGTCC<br>GTTTTGTGT  | 60 | P | N | N |
| BlgSSR60 | (AAG)5                                              | AAATGGGCTCT<br>CGTGTCTTG  | GCTTGGTGGAC<br>AGAGGAGAG  | 60 | P | P | M |
| BlgSSR61 | (GAC)5                                              | GACGAGCTCA<br>TGAGTGGACA  | CTCACTTCCGT<br>AGTCGGCTC  | 60 | M | M | M |
| BlgSSR62 | (AT)6                                               | TTGGTGGAGG<br>AACTTTGAGG  | GACGGATTCTT<br>CGCACTCTC  | 60 | P | P | M |
| BlgSSR63 | (GAC)5                                              | AGTTAGTAAA                | GTGACCTTTGT               | 60 | M | M | M |

|           |              |             |              |    |   |   |   |
|-----------|--------------|-------------|--------------|----|---|---|---|
|           |              | CGCGCTCCGA  | ACGCCGTCT    |    |   |   |   |
| BlgSSR64  | (CG)6        | AGTGGGAATA  | CACGACACCTT  | 60 | M | P | M |
|           |              | CGAACGAACG  | ACCATGTGC    |    |   |   |   |
| BlgSSR65  | (GTC)5       | CTAAATAACC  | GTTCTGTGGAA  | 60 | M | M | M |
|           |              | GTTCCGCCAA  | GAAGCAGGC    |    |   |   |   |
| BlgSSR66  | (CT)6        | TTCGCTCATCC | CGAGTGGGAA   | 60 | M | P | P |
|           |              | TAAGGCACT   | GAAGCGTAAG   |    |   |   |   |
| BlgSSR67  | (CTC)5       | AAGGATCCCT  | ATCTCCGCTGT  | 60 | M | M | M |
|           |              | GGACGTTTCT  | GGTCAATTC    |    |   |   |   |
| BlgSSR68  | (CAG)6       | AATTCAAGGG  | GTTTCTGTGTTG | 60 | N | N | N |
|           |              | AATTGGGGAC  | TGGTTGTTG    |    |   |   |   |
| BlgSSR69  | (CG)7        | TCGAGTCTCCA | TGTGCCTCCTT  | 60 | M | M | M |
|           |              | AAGATGCCT   | AACCAGCTC    |    |   |   |   |
| BlgSSR70  | (TCC)5       | TCGTGTCTCTA | AGACGAGAAT   | 60 | M | M | M |
|           |              | CGTTCGTGC   | GCGAACGACT   |    |   |   |   |
| BlgSSR71  | (CCA)5       | ATTTCCATATC | TCTTGAATCTG  | 60 | P | M | M |
|           |              | TTCCCCGCT   | AGCACGCTG    |    |   |   |   |
| BlgSSR72  | (AG)7        | CGGTGCCAGT  | TGATTCCTGCC  | 60 | P | M | M |
|           |              | GTTCCCTTATT | CTTTCATTC    |    |   |   |   |
| BlgSSR73  | (CCGC)6      | GCTAGTTTCTT | ATTTAACGAGT  | 60 | P | M | M |
|           |              | GTCTGCCCG   | GGGCCAGTG    |    |   |   |   |
| BlgSSR74  | (AATG)6      | CATCTTAGCCG | ATTCCGTAAGT  | 60 | P | P | M |
|           |              | CTGGTTTC    | TGGGCAGTG    |    |   |   |   |
| BlgSSR75  | (CGT)6       | AGTGCCATATG | CCCTATCGCAC  | 60 | M | N | P |
|           |              | ACCCAAAGC   | AAAAAGCAT    |    |   |   |   |
| BlgSSR76  | (GAG)5       | CGAGGAAGGC  | GTCTCGTCGT   | 60 | M | M | P |
|           |              | GAGACAATAC  | CCTCTCAG     |    |   |   |   |
| BlgSSR77  | (TCA)6       | ATGGTTACTTC | CGTGCAGCAG   | 60 | P | P | P |
|           |              | GTGTTCCGC   | ACTTCCATA    |    |   |   |   |
| BlgSSR78  | (CGA)5       | GAAAGCTCGC  | AGAAGAAGCC   | 60 | M | P | P |
|           |              | CATCAGACTC  | CGAAGAGAGC   |    |   |   |   |
| BlgSSR79  | (CAA)6       | CCACCACCTCG | AACTTGATCCA  | 60 | P | P | P |
|           |              | TTTCACTTT   | TGGGCTGAG    |    |   |   |   |
| BlgSSR80  | (TA)9        | GCACCGACTAT | TTAGGAACATC  | 60 | M | M | P |
|           |              | TTGCCGTAT   | CGGTGAAGC    |    |   |   |   |
| BlgSSR81  | (AC)7        | ACTGCGTCGTG | GTCGCTAAGTA  | 60 | P | N | N |
|           |              | GTGTACAAG   | TCGGTGGGA    |    |   |   |   |
| BlgSSR82  | (TCC)5       | GTCCGCATCAT | CATAAGCCCG   | 60 | P | M | M |
|           |              | CATCTTCCT   | GTAGATCGAA   |    |   |   |   |
| BlgSSR83  | (TA)7        | GCTAAACCTCT | TGGGCTGCAC   | 60 | P | M | M |
|           |              | CATCGCCAG   | AGACAATAAG   |    |   |   |   |
| BlgSSR84  | (GT)7        | AAGGACACGC  | AAGTGGAACT   | 60 | P | N | N |
|           |              | CAAAATGTTC  | GAAGCCATCG   |    |   |   |   |
| BlgSSR85  | (CGC)5       | TTATTGAAGTT | TTTCGGCTTCA  | 60 | M | P | P |
|           |              | GCCTTGCCC   | TATCCTTCG    |    |   |   |   |
| BlgSSR86  | (CT)6        | CTCCAAGAAG  | GAGGACTTCTT  | 60 | P | N | N |
|           |              | ATGTCCGGAGC | CCTGCCTTC    |    |   |   |   |
| BlgSSR87  | (GGA)7       | TGAAACTCGTC | TTCACCAGGTC  | 60 | P | P | P |
|           |              | GTCTTGTGG   | GTTCTCCTC    |    |   |   |   |
| BlgSSR88  | (GA)6        | AGTCTCGAACC | CGTTGACCAA   | 60 | P | P | P |
|           |              | CAATCCCTT   | GACCCATTCT   |    |   |   |   |
| BlgSSR89  | (CG)6        | GACCTTGACC  | GAGGATGGAA   | 60 | P | M | M |
|           |              | TCGTTCTGG   | CAGTGGAGGA   |    |   |   |   |
| BlgSSR90  | (TC)6        | CTTATCGTCCC | GTCCGGATTAC  | 60 | P | P | M |
|           |              | CGTTCTCAA   | ACGGTGAAG    |    |   |   |   |
| BlgSSR91  | (TGC)5       | CTCCCGGTATA | ATGTCAATCGT  | 60 | P | M | P |
|           |              | CCTCGTTCA   | CTAAGCCGC    |    |   |   |   |
| BlgSSR92  | (CT)7        | GCATTTACCA  | CGGTTCTGTGC  | 60 | M | M | M |
|           |              | GTGTTGTGG   | TATGTGGTG    |    |   |   |   |
| BlgSSR93  | (TCA)5(TCG)7 | AATACCGGTGT | CCGCATCAAAA  | 60 | M | P | M |
|           |              | TCAAGCCAG   | CCCCTATCT    |    |   |   |   |
| BlgSSR94  | (CAG)5       | GTTGAGAAGG  | GGGAGAATGG   | 60 | P | M | M |
|           |              | AGCGTTCCAG  | GATTGGACTT   |    |   |   |   |
| BlgSSR95  | (CG)6        | GTCACCCCTC  | GGTACGTCATG  | 60 | P | M | M |
|           |              | CATCCTATT   | TTCTGCACG    |    |   |   |   |
| BlgSSR96  | (CCT)5       | CTCGTCAATAA | CCAAGAGGAG   | 60 | P | M | M |
|           |              | CATCCGCCT   | GACGAAGATG   |    |   |   |   |
| BlgSSR97  | (TA)7        | CAATCTTGCTA | AATCAACGAC   | 60 | M | N | M |
|           |              | CTCTCCGCC   | TGTTGGAGGG   |    |   |   |   |
| BlgSSR98  | (GT)6(GC)6   | GTACATCTGGG | AGTGAGAAGT   | 60 | P | P | P |
|           |              | GAAGGGGAT   | GGGGCTTCAA   |    |   |   |   |
| BlgSSR99  | (TCC)5       | CGCATTGTCGG | ATTAGGGCTG   | 60 | M | P | P |
|           |              | TCTCAGTAA   | GTCGTTGTTG   |    |   |   |   |
| BlgSSR100 | (TCC)6       | CCCCGTCCTCT | AATACGGGTC   | 60 | P | P | P |
|           |              | AGTTCATCA   | GTCAGATTCCG  |    |   |   |   |



**Supplementary Table S2. Detailed information for the three *Pleurotus* taxa populations.**

| Number | Strain name | Species                        | Strain types      | Source              |
|--------|-------------|--------------------------------|-------------------|---------------------|
| 1      | CCMJ964     | <i>P. tuolesis</i> (Bailinggu) | Wild stain        | Xinjiang, China     |
| 2      | CCMJ968     | <i>P. tuolesis</i> (Bailinggu) | Wild stain        | Xinjiang, China     |
| 3      | CCMJ969     | <i>P. tuolesis</i> (Bailinggu) | Wild stain        | Xinjiang, China     |
| 4      | CCMJ973     | <i>P. tuolesis</i> (Bailinggu) | Wild stain        | Xinjiang, China     |
| 5      | CCMJ979     | <i>P. tuolesis</i> (Bailinggu) | Wild stain        | Xinjiang, China     |
| 6      | CCMJ980     | <i>P. tuolesis</i> (Bailinggu) | Wild stain        | Xinjiang, China     |
| 7      | CCMJ981     | <i>P. tuolesis</i> (Bailinggu) | Wild stain        | Xinjiang, China     |
| 8      | CCMJ994     | <i>P. tuolesis</i> (Bailinggu) | Wild stain        | Xinjiang, China     |
| 9      | CCMJ997     | <i>P. tuolesis</i> (Bailinggu) | Wild stain        | Xinjiang, China     |
| 10     | CCMJ1002    | <i>P. tuolesis</i> (Bailinggu) | Wild stain        | Xinjiang, China     |
| 11     | CCMJ828     | <i>P. tuolesis</i> (Bailinggu) | Cultivated strain | Jilin, China        |
| 12     | CCMJ829     | <i>P. tuolesis</i> (Bailinggu) | Wild stain        | Xinjiang, China     |
| 13     | CCMJ1123    | <i>P. tuolesis</i> (Bailinggu) | Cultivated strain | Shandong, China     |
| 14     | CCMJ1157    | <i>P. tuolesis</i> (Bailinggu) | Cultivated strain | Heilongjiang, China |
| 15     | CCMJ1160    | <i>P. tuolesis</i> (Bailinggu) | Wild stain        | Xinjiang, China     |
| 16     | CCMJ1161    | <i>P. tuolesis</i> (Bailinggu) | Wild stain        | Xinjiang, China     |
| 17     | CCMJ1162    | <i>P. tuolesis</i> (Bailinggu) | Wild stain        | Xinjiang, China     |
| 18     | CCMJ1165    | <i>P. tuolesis</i> (Bailinggu) | Wild stain        | Xinjiang, China     |
| 19     | CCMJ1166    | <i>P. tuolesis</i> (Bailinggu) | Wild stain        | Xinjiang, China     |
| 20     | CCMJ1170    | <i>P. tuolesis</i> (Bailinggu) | Wild stain        | Xinjiang, China     |
| 21     | CCMJ1172    | <i>P. tuolesis</i> (Bailinggu) | Wild stain        | Xinjiang, China     |
| 22     | CCMJ1173    | <i>P. tuolesis</i> (Bailinggu) | Wild stain        | Xinjiang, China     |
| 23     | CCMJ1668    | <i>P. tuolesis</i> (Bailinggu) | Cultivated strain | Beijing, China      |
| 24     | CCMJ1669    | <i>P. tuolesis</i> (Bailinggu) | Cultivated strain | Beijing, China      |
| 25     | CCMJ1676    | <i>P. tuolesis</i> (Bailinggu) | Cultivated strain | Xinjiang, China     |
| 26     | CCMJ812     | <i>P. tuolesis</i> (Bailinggu) | Cultivated strain | Xinjiang, China     |
| 27     | CCMJ1148    | <i>P. tuolesis</i> (Bailinggu) | Cultivated strain | Sichuan, China      |
| 28     | CCMJ1667    | <i>P. tuolesis</i> (Bailinggu) | Cultivated strain | Liaoning, China     |
| 29     | CCMJ1171    | <i>P. tuolesis</i> (Bailinggu) | Wild stain        | Xinjiang, China     |
| 30     | CCMJ1670    | <i>P. tuolesis</i> (Bailinggu) | Cultivated strain | Beijing, China      |
| 31     | CCMJ1077    | <i>P. tuolesis</i> (Bailinggu) | Cultivated strain | Xinjiang, China     |
| 32     | CCMJ814     | <i>P. tuolesis</i> (Bailinggu) | Cultivated strain | Xinjiang, China     |
| 33     | CCMJ983     | <i>P. tuolesis</i> (Bailinggu) | Wild stain        | Xinjiang, China     |
| 34     | CCMJ816     | <i>P. tuolesis</i> (Bailinggu) | Cultivated strain | Beijing, China      |
| 35     | CCMJ1176    | <i>P. tuolesis</i> (Bailinggu) | Wild stain        | Xinjiang, China     |
| 36     | CCMJ996     | <i>P. tuolesis</i> (Bailinggu) | Wild stain        | Xinjiang, China     |
| 37     | CCMJ987     | <i>P. tuolesis</i> (Bailinggu) | Wild stain        | Xinjiang, China     |
| 38     | CCMJ975     | <i>P. tuolesis</i> (Bailinggu) | Wild stain        | Xinjiang, China     |
| 39     | CCMJ976     | <i>P. tuolesis</i> (Bailinggu) | Wild stain        | Xinjiang, China     |
| 40     | CCMJ1097    | <i>P. tuolesis</i> (Bailinggu) | Wild stain        | Xinjiang, China     |
| 41     | CCMJ999     | <i>P. tuolesis</i> (Bailinggu) | Wild stain        | Xinjiang, China     |
| 42     | CCMJ1000    | <i>P. tuolesis</i> (Bailinggu) | Wild stain        | Xinjiang, China     |
| 43     | CCMJ1001    | <i>P. tuolesis</i> (Bailinggu) | Wild stain        | Xinjiang, China     |
| 44     | CCMJ1003    | <i>P. tuolesis</i> (Bailinggu) | Wild stain        | Xinjiang, China     |
| 45     | CCMJ1119    | <i>P. tuolesis</i> (Bailinggu) | Cultivated strain | Shanghai, China     |

|    |          |                                                   |                   |                 |
|----|----------|---------------------------------------------------|-------------------|-----------------|
| 46 | CCMJ1118 | <i>P. tuolexis</i> (Bailinggu)                    | Cultivated strain | Shanghai, China |
| 47 | CCMJ819  | <i>P. tuolexis</i> (Bailinggu)                    | Cultivated strain | Beijing, China  |
| 48 | CCMJ1163 | <i>P. tuolexis</i> (Bailinggu)                    | Wild stain        | Xinjiang, China |
| 49 | CCMJ1164 | <i>P. tuolexis</i> (Bailinggu)                    | Wild stain        | Xinjiang, China |
| 50 | CCMJ1167 | <i>P. tuolexis</i> (Bailinggu)                    | Wild stain        | Xinjiang, China |
| 51 | CCMJ1175 | <i>P. tuolexis</i> (Bailinggu)                    | Wild stain        | Xinjiang, China |
| 52 | CCMJ1044 | <i>P. tuolexis</i> (Bailinggu)                    | Cultivated strain | Beijing, China  |
| 53 | CCMJ1174 | <i>P. eryngii</i> var. <i>ferulea</i> (Aweigu)    | Wild stain        | Xinjiang, China |
| 54 | CCMJ991  | <i>P. eryngii</i> var. <i>ferulea</i> (Aweigu)    | Wild stain        | Xinjiang, China |
| 55 | CCMJ992  | <i>P. eryngii</i> var. <i>ferulea</i> (Aweigu)    | Wild stain        | Xinjiang, China |
| 56 | CCMJ993  | <i>P. eryngii</i> var. <i>ferulea</i> (Aweigu)    | Wild stain        | Xinjiang, China |
| 57 | CCMJ989  | <i>P. eryngii</i> var. <i>ferulea</i> (Aweigu)    | Wild stain        | Xinjiang, China |
| 58 | CCMJ990  | <i>P. eryngii</i> var. <i>ferulea</i> (Aweigu)    | Wild stain        | Xinjiang, China |
| 59 | CCMJ985  | <i>P. eryngii</i> var. <i>ferulea</i> (Aweigu)    | Wild stain        | Xinjiang, China |
| 60 | CCMJ986  | <i>P. eryngii</i> var. <i>ferulea</i> (Aweigu)    | Wild stain        | Xinjiang, China |
| 61 | CCMJ970  | <i>P. eryngii</i> var. <i>ferulea</i> (Aweigu)    | Wild stain        | Xinjiang, China |
| 62 | CCMJ971  | <i>P. eryngii</i> var. <i>ferulea</i> (Aweigu)    | Wild stain        | Xinjiang, China |
| 63 | CCMJ972  | <i>P. eryngii</i> var. <i>ferulea</i> (Aweigu)    | Wild stain        | Xinjiang, China |
| 64 | CCMJ1150 | <i>P. eryngii</i> var. <i>ferulea</i> (Aweigu)    | Cultivated strain | Sichuan, China  |
| 65 | CCMJ825  | <i>P. eryngii</i> var. <i>ferulea</i> (Aweigu)    | Cultivated strain | Shandong, China |
| 66 | CCMJ984  | <i>P. eryngii</i> var. <i>ferulea</i> (Aweigu)    | Wild stain        | Xinjiang, China |
| 67 | CCMJ1717 | <i>P. eryngii</i> var. <i>ferulea</i> (Aweigu)    | Cultivated strain | Shandong, China |
| 68 | CCMJ1732 | <i>P. eryngii</i> var. <i>eryngii</i> (Xingbaogu) | Cultivated strain | Jiangsu, China  |
| 69 | CCMJ1066 | <i>P. eryngii</i> var. <i>eryngii</i> (Xingbaogu) | Cultivated strain | Sichuan, China  |
| 70 | CCMJ656  | <i>P. eryngii</i> var. <i>eryngii</i> (Xingbaogu) | Cultivated strain | Fujian, China   |
| 71 | CCMJ653  | <i>P. eryngii</i> var. <i>eryngii</i> (Xingbaogu) | Cultivated strain | Fujian, China   |
| 72 | CCMJ657  | <i>P. eryngii</i> var. <i>eryngii</i> (Xingbaogu) | Cultivated strain | Fujian, China   |
| 73 | CCMJ1072 | <i>P. eryngii</i> var. <i>eryngii</i> (Xingbaogu) | Cultivated strain | Beijing, China  |
| 74 | CCMJ1130 | <i>P. eryngii</i> var. <i>eryngii</i> (Xingbaogu) | Cultivated strain | Fujian, China   |
| 75 | CCMJ1683 | <i>P. eryngii</i> var. <i>eryngii</i> (Xingbaogu) | Cultivated strain | Jilin, China    |
| 76 | CCMJ1102 | <i>P. eryngii</i> var. <i>eryngii</i> (Xingbaogu) | Cultivated strain | Shanghai, China |
| 77 | CCMJ1693 | <i>P. eryngii</i> var. <i>eryngii</i> (Xingbaogu) | Cultivated strain | Liaoning, China |
| 78 | CCMJ1699 | <i>P. eryngii</i> var. <i>eryngii</i> (Xingbaogu) | Cultivated strain | Shandong, China |
| 79 | CCMJ1707 | <i>P. eryngii</i> var. <i>eryngii</i> (Xingbaogu) | Cultivated strain | Shandong, China |
| 80 | CCMJ645  | <i>P. eryngii</i> var. <i>eryngii</i> (Xingbaogu) | Cultivated strain | Beijing, China  |
| 81 | CCMJ1725 | <i>P. eryngii</i> var. <i>eryngii</i> (Xingbaogu) | Cultivated strain | Shandong, China |
| 82 | CCMJ1731 | <i>P. eryngii</i> var. <i>eryngii</i> (Xingbaogu) | Cultivated strain | Liaoning, China |

---

**Supplementary Table S3. Characteristics of the 26 polymorphic EST-SSR markers in the three *Pleurotus* taxa populations.**

| Locus    | Samples | Na    | Ne     | Ho    | He    | I      | PIC   |
|----------|---------|-------|--------|-------|-------|--------|-------|
| BlgSSR1  | 82      | 7     | 2.6204 | 0.268 | 0.622 | 1.2293 | 0.561 |
| BlgSSR2  | 82      | 7     | 3.284  | 0.256 | 0.7   | 1.4534 | 0.659 |
| BlgSSR3  | 82      | 7     | 2.1455 | 0.232 | 0.537 | 1.148  | 0.505 |
| BlgSSR4  | 82      | 6     | 3.9705 | 0.317 | 0.753 | 1.5705 | 0.716 |
| BlgSSR5  | 82      | 4     | 2.5245 | 0.244 | 0.608 | 1.1106 | 0.553 |
| BlgSSR6  | 82      | 10    | 3.1815 | 0.244 | 0.69  | 1.5109 | 0.651 |
| BlgSSR7  | 82      | 10    | 3.6915 | 0.195 | 0.734 | 1.7037 | 0.703 |
| BlgSSR8  | 82      | 6     | 2.2541 | 0.085 | 0.56  | 1.0367 | 0.49  |
| BlgSSR9  | 82      | 2     | 1.8299 | 0.305 | 0.456 | 0.6459 | 0.351 |
| BlgSSR10 | 82      | 9     | 3.5057 | 0.39  | 0.719 | 1.5501 | 0.677 |
| BlgSSR11 | 82      | 10    | 4.7319 | 0.549 | 0.794 | 1.7942 | 0.761 |
| BlgSSR12 | 82      | 10    | 3.5605 | 0.512 | 0.724 | 1.6051 | 0.686 |
| BlgSSR13 | 82      | 10    | 6.1016 | 0.378 | 0.841 | 1.9542 | 0.816 |
| BlgSSR14 | 82      | 6     | 3.9002 | 0.488 | 0.748 | 1.4601 | 0.7   |
| BlgSSR15 | 82      | 13    | 4.4179 | 0.402 | 0.778 | 1.7817 | 0.741 |
| BlgSSR16 | 82      | 11    | 4.2289 | 0.683 | 0.768 | 1.7514 | 0.737 |
| BlgSSR17 | 82      | 8     | 2.5728 | 0.354 | 0.615 | 1.2892 | 0.571 |
| BlgSSR18 | 82      | 10    | 3.6623 | 0.573 | 0.731 | 1.5917 | 0.687 |
| BlgSSR19 | 82      | 11    | 2.2417 | 0.122 | 0.557 | 1.2786 | 0.53  |
| BlgSSR20 | 82      | 6     | 2.8425 | 0.195 | 0.652 | 1.3241 | 0.609 |
| BlgSSR21 | 82      | 6     | 2.6928 | 0.207 | 0.633 | 1.1458 | 0.555 |
| BlgSSR22 | 82      | 3     | 2.8282 | 0.183 | 0.65  | 1.0677 | 0.572 |
| BlgSSR23 | 82      | 12    | 2.6816 | 0.354 | 0.631 | 1.5508 | 0.611 |
| BlgSSR24 | 82      | 10    | 4.712  | 0.683 | 0.793 | 1.8009 | 0.761 |
| BlgSSR25 | 82      | 12    | 6.1688 | 0.476 | 0.843 | 2.1353 | 0.825 |
| BlgSSR26 | 82      | 4     | 1.642  | 0.098 | 0.393 | 0.6829 | 0.339 |
| Mean     |         | 8.077 | 3.384  | 0.338 | 0.674 | 1.429  | 0.629 |

**Supplementary Table S4. Characteristics of the 26 polymorphic EST-SSR markers in the Xingbaogu population.**

| <b>Locus</b> | <b>Samples</b> | <b>Na</b> | <b>Ne</b> | <b>Ho</b> | <b>He</b> | <b>I</b> | <b>PIC</b> |
|--------------|----------------|-----------|-----------|-----------|-----------|----------|------------|
| BlgSSR1      | 15             | 3.000     | 1.402     | 0.333     | 0.287     | 0.534    | 0.26       |
| BlgSSR2      | 15             | 2.000     | 1.142     | 0.000     | 0.124     | 0.245    | 0.117      |
| BlgSSR3      | 15             | 5.000     | 2.778     | 0.467     | 0.640     | 1.249    | 0.594      |
| BlgSSR4      | 15             | 4.000     | 2.473     | 0.600     | 0.596     | 1.073    | 0.539      |
| BlgSSR5      | 15             | 2.000     | 1.301     | 0.267     | 0.231     | 0.393    | 0.204      |
| BlgSSR6      | 15             | 4.000     | 2.113     | 0.200     | 0.527     | 0.899    | 0.445      |
| BlgSSR7      | 15             | 4.000     | 3.383     | 0.067     | 0.704     | 1.289    | 0.651      |
| BlgSSR8      | 15             | 1.000     | 1.000     | 0.000     | 0.000     | 0.000    | 0          |
| BlgSSR9      | 15             | 1.000     | 1.000     | 0.000     | 0.000     | 0.000    | 0          |
| BlgSSR10     | 15             | 2.000     | 1.069     | 0.067     | 0.064     | 0.146    | 0.062      |
| BlgSSR11     | 15             | 3.000     | 2.632     | 0.933     | 0.620     | 1.030    | 0.548      |
| BlgSSR12     | 15             | 3.000     | 2.663     | 0.800     | 0.624     | 1.028    | 0.545      |
| BlgSSR13     | 15             | 3.000     | 2.486     | 0.800     | 0.598     | 0.995    | 0.526      |
| BlgSSR14     | 15             | 2.000     | 1.471     | 0.400     | 0.320     | 0.500    | 0.269      |
| BlgSSR15     | 15             | 5.000     | 2.778     | 0.133     | 0.640     | 1.203    | 0.581      |
| BlgSSR16     | 15             | 3.000     | 2.228     | 0.867     | 0.551     | 0.882    | 0.456      |
| BlgSSR17     | 15             | 6.000     | 3.846     | 1.000     | 0.740     | 1.541    | 0.703      |
| BlgSSR18     | 15             | 3.000     | 2.419     | 0.800     | 0.587     | 0.970    | 0.509      |
| BlgSSR19     | 15             | 6.000     | 1.807     | 0.333     | 0.447     | 0.996    | 0.43       |
| BlgSSR20     | 15             | 3.000     | 1.613     | 0.467     | 0.380     | 0.683    | 0.342      |
| BlgSSR21     | 15             | 2.000     | 1.867     | 0.067     | 0.464     | 0.657    | 0.357      |
| BlgSSR22     | 15             | 2.000     | 1.385     | 0.067     | 0.278     | 0.451    | 0.239      |
| BlgSSR23     | 15             | 3.000     | 2.406     | 0.467     | 0.584     | 0.948    | 0.495      |
| BlgSSR24     | 15             | 3.000     | 2.866     | 0.933     | 0.651     | 1.074    | 0.576      |
| BlgSSR25     | 15             | 4.000     | 2.528     | 0.733     | 0.604     | 1.058    | 0.529      |
| BlgSSR26     | 15             | 1.000     | 1.000     | 0.000     | 0.000     | 0.000    | 0          |
| <b>Mean</b>  |                | 3.077     | 2.064     | 0.415     | 0.433     | 0.763    | 0.384      |

**Supplementary Table S5. Characteristics of the 26 polymorphic EST-SSR markers in the Aweigu population.**

| Locus    | Sample | Na    | Ne    | Ho    | He    | I     | PIC    |
|----------|--------|-------|-------|-------|-------|-------|--------|
| BlgSSR1  | 15     | 2.000 | 1.385 | 0.200 | 0.278 | 0.451 | 0.239  |
| BlgSSR2  | 15     | 2.000 | 1.142 | 0.133 | 0.124 | 0.245 | 0.117  |
| BlgSSR3  | 15     | 2.000 | 1.642 | 0.000 | 0.391 | 0.580 | 0.315  |
| BlgSSR4  | 15     | 1.000 | 1.000 | 0.000 | 0.000 | 0.000 | 0      |
| BlgSSR5  | 15     | 3.000 | 1.402 | 0.333 | 0.287 | 0.534 | 0.26   |
| BlgSSR6  | 15     | 4.000 | 2.239 | 0.067 | 0.553 | 1.057 | 0.515  |
| BlgSSR7  | 15     | 4.000 | 3.285 | 0.067 | 0.696 | 1.282 | 0.644  |
| BlgSSR8  | 15     | 3.000 | 2.018 | 0.400 | 0.504 | 0.831 | 0.428  |
| BlgSSR9  | 15     | 1.000 | 1.000 | 0.000 | 0.000 | 0.000 | 0      |
| BlgSSR10 | 15     | 5.000 | 3.543 | 0.667 | 0.718 | 1.385 | 0.67   |
| BlgSSR11 | 15     | 2.000 | 1.965 | 0.200 | 0.491 | 0.684 | 0.371  |
| BlgSSR12 | 15     | 7.000 | 3.237 | 0.533 | 0.691 | 1.484 | 0.659  |
| BlgSSR13 | 15     | 1.000 | 1.000 | 0.000 | 0.000 | 0.000 | 0      |
| BlgSSR14 | 15     | 3.000 | 1.495 | 0.267 | 0.331 | 0.591 | 0.294  |
| BlgSSR15 | 15     | 9.000 | 3.689 | 0.733 | 0.729 | 1.682 | 0.704  |
| BlgSSR16 | 15     | 6.000 | 4.286 | 0.733 | 0.767 | 1.580 | 0.731  |
| BlgSSR17 | 15     | 2.000 | 1.142 | 0.133 | 0.124 | 0.245 | 0.117  |
| BlgSSR18 | 15     | 2.000 | 1.142 | 0.133 | 0.124 | 0.245 | 0.117  |
| BlgSSR19 | 15     | 6.000 | 3.879 | 0.333 | 0.742 | 1.522 | 0.702  |
| BlgSSR20 | 15     | 3.000 | 1.226 | 0.067 | 0.184 | 0.389 | 0.175  |
| BlgSSR21 | 15     | 3.000 | 1.145 | 0.133 | 0.127 | 0.291 | 0.123  |
| BlgSSR22 | 15     | 2.000 | 1.069 | 0.067 | 0.064 | 0.146 | 0.062  |
| BlgSSR23 | 15     | 5.000 | 3.409 | 0.267 | 0.707 | 1.315 | 0.649  |
| BlgSSR24 | 15     | 7.000 | 3.383 | 0.400 | 0.704 | 1.474 | 0.661  |
| BlgSSR25 | 15     | 5.000 | 2.446 | 0.667 | 0.591 | 1.058 | 0.507  |
| BlgSSR26 | 15     | 4.000 | 2.184 | 0.533 | 0.542 | 1.000 | 0.495  |
| Mean     |        | 3.615 | 2.129 | 0.272 | 0.403 | 0.772 | 0.3675 |

**Supplementary Table S6. The differentially expressed unigenes (DEGs) between four different developmental stages.**

**Supplementary Table S7. FPKM data of all samples.**

**Supplementary Table S8. All GeneExpression FPKM data.**

**References**

1. Kanehisa, Furumichi, M., Tanabe, M., Sato, Y., and Morishima, K. KEGG: new perspectives on genomes, pathways, diseases and drugs. *Nucleic Acids Res.* **45**, D353-D361 (2017).
2. Kanehisa, M., Sato, Y., Kawashima, M., Furumichi, M., and Tanabe, M. KEGG as a reference resource for gene and protein annotation. *Nucleic Acids Res.* **44**, D457-D462 (2016).
3. Kanehisa, M. and Goto, S. KEGG: Kyoto Encyclopedia of Genes and Genomes. *Nucleic Acids Res.* **28**, 27-30 (2000).
